## CORRESPONDENCE

**Christoph H. Kindler, M.D.**  
Staff Anesthesiologist  
**Manfred D. Seeberger, M.D.**  
Staff Anesthesiologist  
Department of Anesthesia  
University of Basel, Kantonsspital,  
CH-4031 Basel, Switzerland

## References

1. Pinczower GR, Gyorke A: Vertebral osteomyelitis as a cause of back pain after epidural anesthesia. *ANESTHESIOLOGY* 1996; 84:215-7
2. Dahlgren N, Törnebrandt K: Neurological complications after anaesthesia. A follow-up of 18,000 spinal and epidural anaesthetics performed over three years. *Acta Anaesthesiol Scand* 1995; 39:872-80

3. Palot M, Visseaux H, Botmans C, Pire JC: Epidémiologie des complications de l'analgésie péridurale obstétricale. *Cah Anesthesiol* 1994; 42:229-33
4. Borum SE, McLeskey CH, Williamson JB, Harris FS, Knight AB: Epidural abscess after obstetric epidural analgesia. *ANESTHESIOLOGY* 1995; 82:523-6
5. Wenningsted-Torgard K, Heyn J, Willumsen L: Spondylitis following epidural morphine. A case report. *Acta Anaesthesiol Scand* 1982; 26:649-51
6. Lynch J, Zech D: Spondylitis without epidural abscess formation following short-term use of an epidural catheter. *Acta Anaesthesiol Scand* 1990; 34:167-70
7. Pegues DA, Carr DB, Hopkins CC: Infectious complications with temporary epidural catheters. *Clin Infect Dis* 1994; 19:970-2

(Accepted for publication May 8, 1996.)

Anesthesiology  
1996; 85:445

© 1996 American Society of Anesthesiologists, Inc.  
Lippincott-Raven Publishers

## Color of Compressed Gas Cylinders

*To the Editor:*—Reading the potentially disastrous case of an intraabdominal fire by Greilich *et al.*<sup>1</sup> prompted me to immediately call a major medical gas supplier here in Australia to check whether such a dangerous gas cylinder was available. As in the United States, routinely available Carbogen (5% CO<sub>2</sub> in 95% O<sub>2</sub>) has a different pin index to 100% CO<sub>2</sub>. Other mixtures of CO<sub>2</sub> and O<sub>2</sub> can be supplied on request, but would normally be fitted with a bull-nosed industrial-type valve, unless a medical-type pin-indexed valve was requested. Also as in the United States, if such a medical valve was requested, mixtures with 7% CO<sub>2</sub> or greater would be fitted with pin positions identical those of a 100% CO<sub>2</sub> cylinder. However, the guidelines also specify that the color of the body of the cylinder should be that of the predominant gas (*i.e.*, >50% concentration), and the shoulder of the cylinder should be colored that of the "minor" gas. With these guidelines, 14% CO<sub>2</sub> in 86% oxygen would look more like an oxygen cylinder but would only fit a CO<sub>2</sub> pin-indexed yoke. Although still potentially dangerous, this almost certainly would have been safer than the safety features described in the report (*i.e.*, a small green collar plus a label). One also wonders why such a

mixture with a medical pin index existed in the hospital in the first place.

**Mark Priestley, M.B.B.S., F.A.N.Z.C.A.**  
Staff Specialist  
Department of Anaesthesia  
Westmead Hospital  
Hawkesbury Road  
Westmead 2145 NSW  
Sydney, Australia

## Reference

1. Greilich PE, Greilich NB, Froelich EG: Intraabdominal fire during laparoscopic cholecystectomy. *ANESTHESIOLOGY* 1995; 83:871-4

(Accepted for publication May 14, 1996.)

Anesthesiology  
1996; 85:445-6

© 1996 American Society of Anesthesiologists, Inc.  
Lippincott-Raven Publishers

*In Reply:*—We are delighted to respond to the letter from our Australian colleague, Priestley, regarding safety features in the packaging of the medical gases. Following the Australian guidelines, our

hazardous mixture of the 86% O<sub>2</sub>/14% CO<sub>2</sub> would have been packaged in a green cylinder with gray striping on the collar rather than the reverse.<sup>1</sup> Theoretically, our error could have been averted by
